# Supplementary material
Source: PubMed Central journal article supplement (PMC9169561)
Supplement: NIHMS1807378-supplement-Supplemental.pdf [file NIHMS1807378-supplement-Supplemental.pdf]

## SUPPLEMENTAL MATERIAL

Table 1. Summary of Items in the CCI 20-item

| Item Number | Question                                                |
|-------------|---------------------------------------------------------|
| 1           | Recalling information                                   |
| 2           | Remembering names and faces                             |
| 3           | Remembering things that happened recently               |
| 4           | Recalling conversations a few days later                |
| 5           | Remembering where things are usually kept               |
| 6           | Remembering new information                             |
| 7           | Remembering where he/she placed familiar objects        |
| 8           | Remembering what he/she intended to do                  |
| 9           | Remembering names of family members and friends         |
| 10          | Remembering without notes and reminders                 |
| 11          | People that know him/her would describe their memory as |
| 12          | Remembering things compared to his/her age group        |
| 13          | Making descions about everyday matters                  |
| 14          | Reasoning through a complicated problem                 |
| 15          | Focusing on goals and carrying out a plan               |
| 16          | Shifting easily from one activity to the next           |
| 17          | Organizing daily activities                             |
| 18          | Understanding conversations                             |
| 19          | Expressing himself/herself when speaking                |
| 20          | Following a story in a book, movie or TV                |

Table 2. Summary of Items in the ECog 39-item

| Item Number | Question                                                                                            |
|-------------|-----------------------------------------------------------------------------------------------------|
| 1           | Remembering a few shopping items without a list                                                     |
| 2           | Remembering things that happened recently (such as recent outings, events in the news)              |
| 3           | Recalling conversations a few days later                                                            |
| 4           | Remembering where she/he has placed objects                                                         |
| 5           | Repeating stories and/or questions                                                                  |
| 6           | Remembering the current date or day of the week                                                     |
| 7           | Remembering he/she has already told someone something                                               |
| 8           | Remembering appointments, meetings, or engagements                                                  |
| 9           | Forgetting the names of objects                                                                     |
| 10          | Verbally giving instructions to others                                                              |
| 11          | Finding the right words to use in a conversation                                                    |
| 12          | Communicating thoughts in a conversation                                                            |
| 13          | Following a story in a book or on TV                                                                |
| 14          | Understanding the point of what other people are trying to say                                      |
| 15          | Remembering the meaning of common words                                                             |
| 16          | Describing a program he/she has watched on TV                                                       |
| 17          | Understanding spoken directions or instructions                                                     |
| 18          | Following a map to find a new location.                                                             |
| 19          | Reading a map and helping with directions when someone else is driving                              |
| 20          | Finding one's car in a parking lot                                                                  |
| 21          | Finding the way back to a meeting spot in the mall or other location                                |
| 22          | Finding his/her way around a familiar neighborhood                                                  |
| 23          | Finding his/her way around a familiar store                                                         |
| 24          | Finding his/her way around a house visited many times                                               |
| 25          | Planning the sequence of stops on a shopping trip                                                   |
| 26          | The ability to anticipate weather changes and plan accordingly (i.e. bring a coat or umbrella)      |
| 27          | Developing a schedule in advance of anticipated events                                              |
| 28          | Thinking things through before acting                                                               |
| 29          | Thinking ahead                                                                                      |
| 30          | Keeping living and work space organized                                                             |
| 31          | Balancing the checkbook without error                                                               |
| 32          | Keeping financial records organized                                                                 |
| 33          | Prioritizing tasks by importance                                                                    |
| 34          | Keeping mail and papers organized                                                                   |
| 35          | Using an organized strategy to manage a medication schedule involving multiple medications          |
| 36          | The ability to do two things at once                                                                |
| 37          | Returning to a task after being interrupted                                                         |
| 38          | The ability to concentrate on a task without being distracted by external things in the environment |
| 39          | Cooking or working and talking at the same time                                                     |
